# Supplementary material for: Succession of Intestinal Microbial Structure of Giant Pandas (Ailuropoda melanoleuca) during Different Developmental Stages and Its Correlation with Cellulase Activity
Source: MDPI journal article supplement (doi:10.3390/ani11082358), 2021-08-10
Supplement: s1 [file s1]

**Table S1.** Intestinal bacterial diversity index of giant pandas at different developmental stages

| Sample | Sobs       |            | Shannon index |            | Simpson index |            | Chao       |            | Coverage   |            |
|--------|------------|------------|---------------|------------|---------------|------------|------------|------------|------------|------------|
|        | Aug (2017) | Feb (2018) | Aug (2017)    | Feb (2018) | Aug (2017)    | Feb (2018) | Aug (2017) | Feb (2018) | Aug (2017) | Feb (2018) |
| S1     | 93         | 188        | 1.95          | 1.86       | 0.24          | 0.27       | 112.13     | 256.55     | 0.999      | 0.999      |
| S2     | 113        | 163        | 2.55          | 1.77       | 0.13          | 0.27       | 138.67     | 218.57     | 0.999      | 0.999      |
| S3     | 89         | 83         | 1.39          | 1.68       | 0.41          | 0.26       | 114.3      | 153.13     | 0.999      | 0.999      |
| S4     | 100        | 54         | 1.36          | 1.70       | 0.44          | 0.24       | 133.83     | 69.6       | 0.999      | 0.999      |
| S5     | 94         | 152        | 1.48          | 1.67       | 0.32          | 0.26       | 131.8      | 294.06     | 0.999      | 0.998      |
| S6     | 94         | 98         | 1.27          | 0.98       | 0.39          | 0.52       | 130.25     | 167.46     | 0.999      | 0.999      |

**Table S2.** Intestinal fungal alpha diversity index of giant pandas at different developmental stages.

| Sample | Sobs       |            | Shannon index |            | Simpson index |            | Chao       |            | Coverage   |            |
|--------|------------|------------|---------------|------------|---------------|------------|------------|------------|------------|------------|
|        | Aug (2017) | Feb (2018) | Aug (2017)    | Feb (2018) | Aug (2017)    | Feb (2018) | Aug (2017) | Feb (2018) | Aug (2017) | Feb (2018) |
| S1     | 118        | 406        | 4.01          | 2.92       | 0.03          | 0.10       | 123.60     | 525.25     | 0.999      | 0.998      |
| S2     | 145        | 397        | 2.64          | 3.22       | 0.13          | 0.10       | 232.88     | 437.30     | 0.999      | 0.999      |
| S3     | 443        | 385        | 3.67          | 3.40       | 0.07          | 0.07       | 466.43     | 420.47     | 0.999      | 0.999      |
| S4     | 335        | 335        | 3.17          | 3.17       | 0.09          | 0.09       | 351.53     | 351.53     | 0.999      | 0.999      |
| S5     | 216        | 427        | 3.43          | 3.40       | 0.08          | 0.08       | 222.50     | 482.94     | 0.999      | 0.998      |
| S6     | 232        | 365        | 2.53          | 3.15       | 0.29          | 0.16       | 242.50     | 410.00     | 0.999      | 0.999      |

**Table S3.** Relative abundance of three dominant bacteria in the gut of giant pandas at different developmental stages

| Sample | <i>Streptococcus</i> |           | <i>Escherichia-Shigella</i> |           | <i>Clostridium</i> |           |
|--------|----------------------|-----------|-----------------------------|-----------|--------------------|-----------|
|        | Aug(2017)            | Feb(2018) | Aug(2017)                   | Feb(2018) | Aug(2017)          | Feb(2018) |
| S1     | 14.5%                | 49.2%     | 32.8%                       | 17.5%     | 5%                 | 14.5%     |
| S2     | 14.7%                | 46%       | 26.8%                       | 25.7%     | 11.3%              | 12.8%     |
| S3     | 4%                   | 40%       | 58.5%                       | 14.9%     | 26.5%              | 35.3%     |
| S4     | 3%                   | 40%       | 63.1%                       | 22.2%     | 22%                | 29%       |
| S5     | 33.1%                | 33.5%     | 45.5%                       | 24.7%     | 14.5%              | 32.9%     |
| S6     | 50%                  | 70%       | 39.4%                       | 26%       | 8%                 | 1%        |

**Table S4.** Pearson correlation analysis of cellulase activity and relative abundance of intestinal dominant flora in Giant Panda at different development stages

|                                     | Enzyme | <i>Streptococcus</i> | <i>Escherichia-Shigella</i> | <i>Clostridium-sensu stricto 1</i> | <i>Turicibacter</i> | <i>Lactobacillus</i> | Unclassified_f_Montagnulaceae | <i>Trichosporon</i> | <i>Trimmatostroma</i> | Unclassified_f_norank_o_Pleosporale | Unclassified_f_Apioporaaceae | Unclassified_o_Pleosporales | <i>Leptoxyphium</i> | <i>Shiraia</i> |
|-------------------------------------|--------|----------------------|-----------------------------|------------------------------------|---------------------|----------------------|-------------------------------|---------------------|-----------------------|-------------------------------------|------------------------------|-----------------------------|---------------------|----------------|
| Enzyme                              | 1      | .857*                | -.954**                     | -.835*                             | .623                | .806                 | -.166                         | .684                | -.502                 | -.104                               | -.852*                       | .364                        | .293                | -.376          |
|                                     | 6      | 6                    | 6                           | 6                                  | 6                   | 6                    | 6                             | 6                   | 6                     | 6                                   | 6                            | 6                           | 6                   | 6              |
| <i>Streptococcus</i>                |        | 1                    | -.859*                      | -.687                              | .768                | .760                 | -.140                         | .460                | -.508                 | .295                                | -.842*                       | .157                        | .093                | .049           |
|                                     |        | 6                    | 6                           | 6                                  | 6                   | 6                    | 6                             | 6                   | 6                     | 6                                   | 6                            | 6                           | 6                   | 6              |
| <i>Escherichia-Shigella</i>         |        |                      | 1                           | .718                               | -.745               | -.860*               | .052                          | -.547               | .301                  | .102                                | .713                         | -.205                       | -.145               | .416           |
|                                     |        |                      | 6                           | 6                                  | 6                   | 6                    | 6                             | 6                   | 6                     | 6                                   | 6                            | 6                           | 6                   | 6              |
| <i>Clostridium-sensu stricto 1</i>  |        |                      |                             | 1                                  | -.204               | -.428                | .509                          | -.385               | .612                  | .362                                | .918**                       | -.764                       | -.717               | .309           |
|                                     |        |                      |                             | 6                                  | 6                   | 6                    | 6                             | 6                   | 6                     | 6                                   | 6                            | 6                           | 6                   | 6              |
| <i>Turicibacter</i>                 |        |                      |                             |                                    | 1                   | .921**               | .488                          | .497                | .073                  | .369                                | -.393                        | -.454                       | -.507               | -.145          |
|                                     |        |                      |                             |                                    | 6                   | 6                    | 6                             | 6                   | 6                     | 6                                   | 6                            | 6                           | 6                   | 6              |
| <i>Lactobacillus</i>                |        |                      |                             |                                    |                     | 1                    | .429                          | .726                | -.019                 | .097                                | -.544                        | -.229                       | -.297               | -.429          |
|                                     |        |                      |                             |                                    |                     | 6                    | 6                             | 6                   | 6                     | 6                                   | 6                            | 6                           | 6                   | 6              |
| Unclassified_f_Montagnulaceae       |        |                      |                             |                                    |                     |                      | 1                             | .285                | .748                  | .159                                | .382                         | -.859*                      | -.868*              | -.306          |
|                                     |        |                      |                             |                                    |                     |                      | 6                             | 6                   | 6                     | 6                                   | 6                            | 6                           | 6                   | 6              |
| <i>Trichosporon</i>                 |        |                      |                             |                                    |                     |                      |                               | 1                   | -.321                 | .102                                | -.532                        | -.041                       | -.124               | -.356          |
|                                     |        |                      |                             |                                    |                     |                      |                               | 6                   | 6                     | 6                                   | 6                            | 6                           | 6                   | 6              |
| <i>Trimmatostroma</i>               |        |                      |                             |                                    |                     |                      |                               |                     | 1                     | -.253                               | .713                         | -.642                       | -.593               | -.394          |
|                                     |        |                      |                             |                                    |                     |                      |                               |                     | 6                     | 6                                   | 6                            | 6                           | 6                   | 6              |
| Unclassified_f_norank_o_Pleosporale |        |                      |                             |                                    |                     |                      |                               |                     |                       | 1                                   | -.010                        | -.532                       | -.558               | .803           |
|                                     |        |                      |                             |                                    |                     |                      |                               |                     |                       | 6                                   | 6                            | 6                           | 6                   | 6              |
| Unclassified_f_Apioporaaceae        |        |                      |                             |                                    |                     |                      |                               |                     |                       |                                     | 1                            | -.556                       | -.492               | .054           |
|                                     |        |                      |                             |                                    |                     |                      |                               |                     |                       |                                     | 6                            | 6                           | 6                   | 6              |
| Unclassified_o_Pleosporales         |        |                      |                             |                                    |                     |                      |                               |                     |                       |                                     |                              | 1                           | .996**              | -.131          |
|                                     |        |                      |                             |                                    |                     |                      |                               |                     |                       |                                     |                              | 6                           | 6                   | 6              |
| <i>Leptoxyphium</i>                 |        |                      |                             |                                    |                     |                      |                               |                     |                       |                                     |                              |                             | 1                   | -.120          |
|                                     |        |                      |                             |                                    |                     |                      |                               |                     |                       |                                     |                              |                             | 6                   | 6              |
| <i>Shiraia</i>                      |        |                      |                             |                                    |                     |                      |                               |                     |                       |                                     |                              |                             |                     | 1              |

\*  $P < 0.05$ ; \*\*  $P < 0.01$ .
